# Supplementary material
Source: PubMed Central journal article supplement (PMC5767879)
Supplement: jp7b08711_si_001.pdf [file jp7b08711_si_001.pdf]

## **Supplementary Information for:**

# **Adsorption and Desulfurization Mechanism of Thiophene on Layered FeS (001), (011) and (111) Surfaces: A DFT-D2 Study**

*Nelson Y. Dzade<sup>1\*</sup> and Nora H. de Leeuw<sup>1, 2\*</sup>*

<sup>1</sup>Department of Earth Sciences, Utrecht University, Princetonplein 9, 3584 CC, Utrecht, The Netherlands

<sup>2</sup>School of Chemistry, Cardiff University, Main Building, Park Place, CF10 3AT, Cardiff, United Kingdom

E-mail: [N.Y.Dzade@uu.nl](mailto:N.Y.Dzade@uu.nl) (N.Y.D); [deLeeuwN@cardiff.ac.uk](mailto:deLeeuwN@cardiff.ac.uk) (N.H.dL)

This supporting information contains the detailed information on all other conformations of thiophene adsorption configurations and structural parameters on stoichiometric (S<sup>0</sup>) FeS (001), (011) and (111). It contains three Figures and one Table.

**Figure S1:** Optimized adsorption structures of a thiophene on stoichiometric ( $S^0$ ) FeS(001) surface, in side (top) and top (bottom) views. (Colour scheme: Fe = grey,  $S_{\text{slab}}$  = yellow, C = blue,  $S_{\text{molecule}}$  = orange).

(b) Slant-H

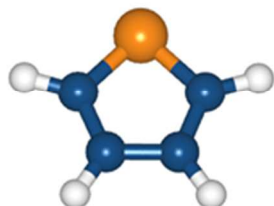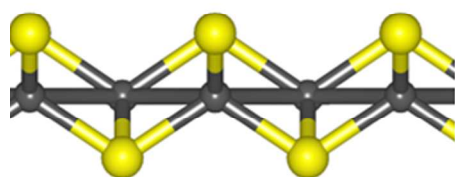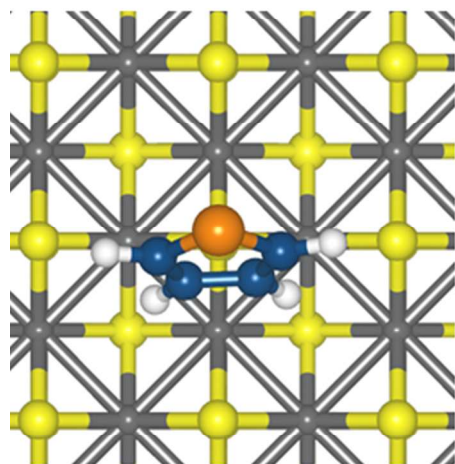

$$E_{\text{ads}} = -0.19 \text{ eV}$$

(c) Upright-S

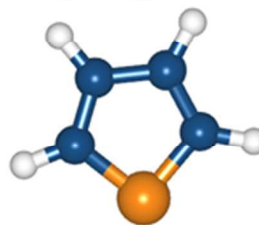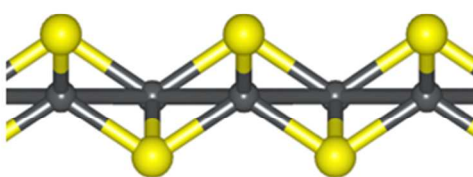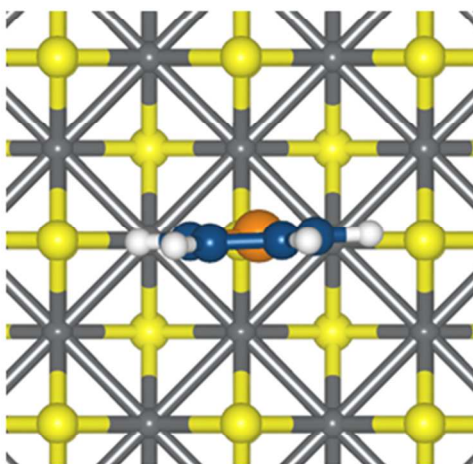

$$E_{\text{ads}} = -0.13 \text{ eV}$$

**Figure S2:** Optimized adsorption structures of a thiophene on stoichiometric ( $S^0$ ) FeS(011) surface, in side (top) and top (bottom) views. (Colour scheme: Fe = grey,  $S_{\text{slab}}$  = yellow, C = blue,  $S_{\text{molecule}}$  = orange).

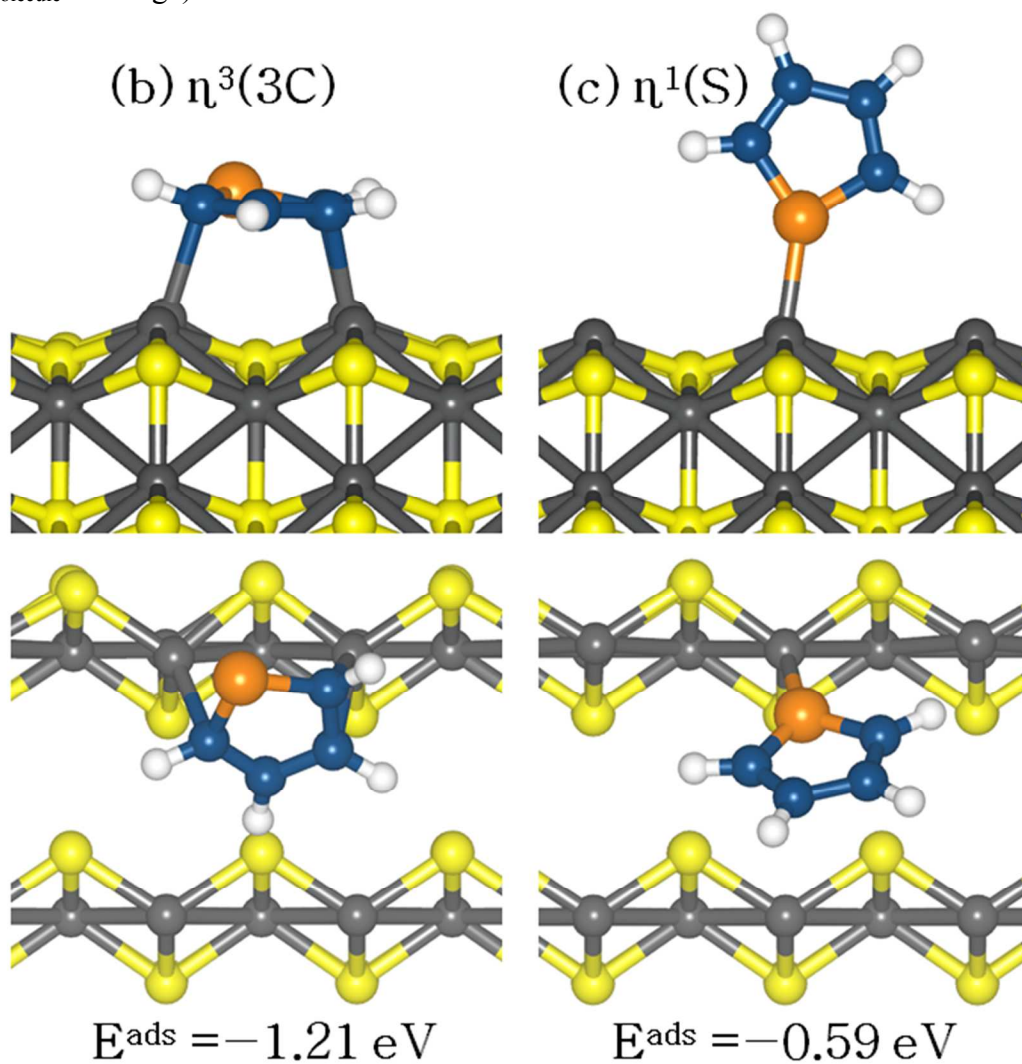

**Figure S2:** Optimized adsorption structures of a thiophene on stoichiometric ( $S^0$ ) FeS(111) surface, in side (top) and top (bottom) views. (Colour scheme: Fe = grey,  $S_{\text{slab}}$  = yellow, C = blue,  $S_{\text{molecule}}$  = orange).

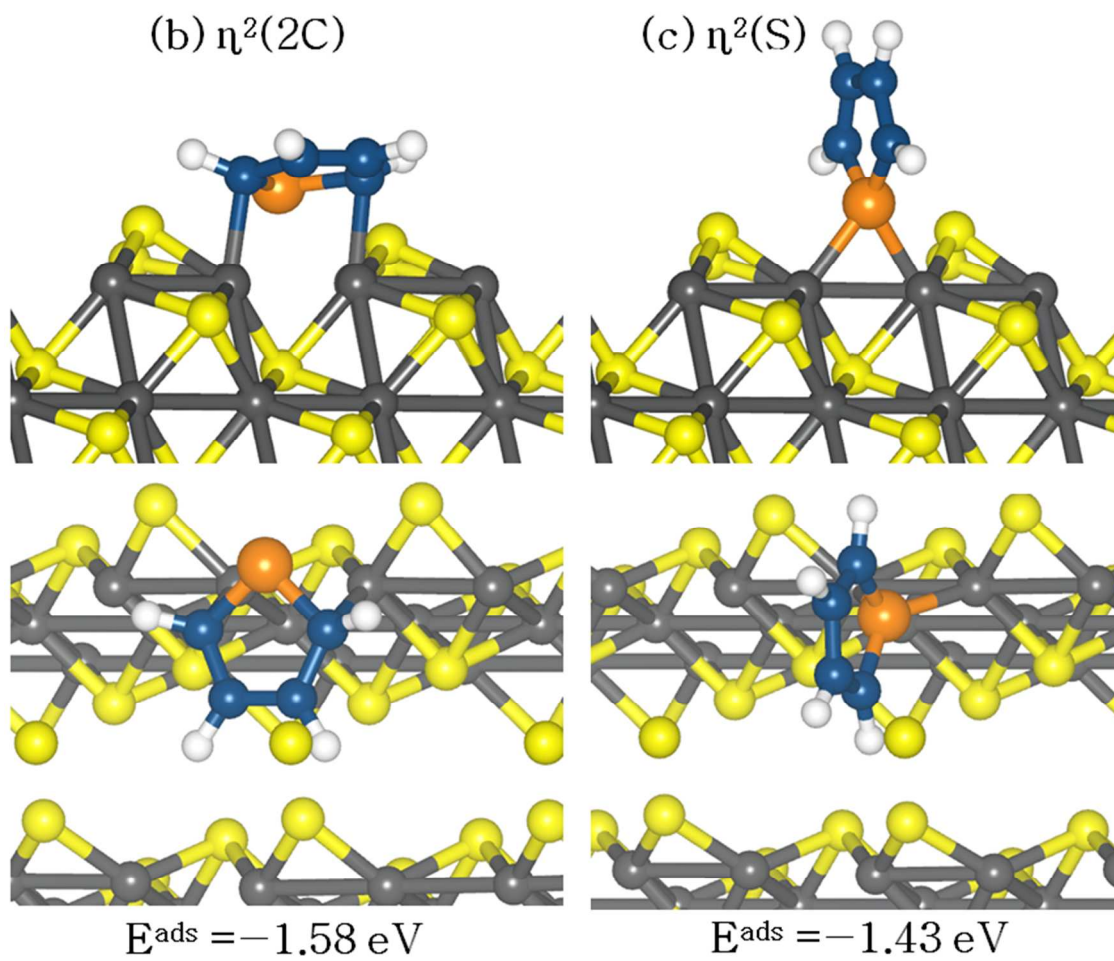

**Table S1:** Adsorption energies and structural parameters of thiophene adsorbed on stoichiometric FeS (001), (011) and (111) surfaces.

| Parameters                                                      | FeS(001) |        | FeS(011)     |             | FeS(111)     |             |
|-----------------------------------------------------------------|----------|--------|--------------|-------------|--------------|-------------|
|                                                                 | S-up     | S-down | $\eta^3(3C)$ | $\eta^1(S)$ | $\eta^2(2C)$ | $\eta^2(S)$ |
| $E_{\text{ads}} / \text{eV}$                                    | -0.19    | -0.13  | -1.21        | -0.59       | -1.58        | -1.43       |
| $\sum q / e^-$                                                  | 0.00     | 0.00   | 0.28         | 0.10        | 0.36         | 0.18        |
| $d(\text{C1-C2}) / \text{\AA}$                                  | 1.374    | 1.375  | 1.402        | 1.373       | 1.427        | 1.357       |
| $d(\text{C2-C3}) / \text{\AA}$                                  | 1.425    | 1.423  | 1.417        | 1.425       | 1.373        | 1.444       |
| $d(\text{C3-C4}) / \text{\AA}$                                  | 1.375    | 1.375  | 1.430        | 1.375       | 1.427        | 1.359       |
| $d(\text{C1-S}) / \text{\AA}$                                   | 1.719    | 1.717  | 1.765        | 1.719       | 1.797        | 1.743       |
| $d(\text{C4-S}) / \text{\AA}$                                   | 1.719    | 1.718  | 1.769        | 1.728       | 1.786        | 1.745       |
| $d(\text{S-Fe}) / \text{\AA}$                                   | ---      | ---    | ---          | 2.255       | 2.412        | 2.194       |
| $d(\text{C-Fe}) / \text{\AA}$                                   | ---      | --     | 2.201        | ---         | 2.124        | ---         |
| $d(\text{S}_{\text{Thio}}-\text{S}_{\text{surf}}) / \text{\AA}$ | ---      | 3.510  | 3.344        |             | 3.184        | 3.378       |
| $d(\text{C}-\text{S}_{\text{surf}}) / \text{\AA}$               | 3.424    | ---    | 3.129        |             | 3.042        | ---         |
| $d(\text{H}-\text{S}_{\text{surf}}) / \text{\AA}$               | 2.989    | ---    | 3.087        |             | 2.766        | 2.413       |
